# Supplementary material for: The role of 4,7-disubstituted phenanthroline ligands in energy transfer of europium(iii) complexes: a DFT study
Source: Royal Society of Chemistry journal article supplement (doi:10.1039/c1nj20441f), 2011-01-01
Supplement: c1nj20441f.pdf [file c1nj20441f.pdf]

**Table S1- Molecular orbital composition of Eu(TTA)<sub>3</sub>(phen-X) complexes**

| Orbital | Eu_TTA        | Eu_phen            | Eu_phen_methyl       | Eu_phen_methoxy      | Eu_phen_chloro     |
|---------|---------------|--------------------|----------------------|----------------------|--------------------|
| H-14    | $\pi$ (TTA)   | $\pi$ (TTA)        | $\pi$ (TTA)          | $\pi$ (phen + TTA)   | $\pi$ (TTA)        |
| H-13    | $\pi$ (TTA)   | $\pi$ (phen)       | $\pi$ (phen)         | $\pi$ (TTA)          | $\pi$ (phen)       |
| H-12    | $\pi$ (TTA)   | $\pi$ (TTA)        | $\pi$ (TTA)          | $\pi$ (phen + TTA)   | $\pi$ (TTA + phen) |
| H-11    | $\pi$ (TTA)   | $\pi$ (TTA)        | $\pi$ (TTA)          | $\pi$ (TTA)          | $\pi$ (TTA + phen) |
| H-10    | $\pi$ (TTA)   | $\pi$ (TTA)        | $\pi$ (TTA)          | $\pi$ (TTA)          | $\pi$ (TTA)        |
| H-9     | $\pi$ (TTA)   | $\pi$ (TTA + phen) | $\pi$ (TTA)          | $\pi$ (TTA)          | $\pi$ (TTA + phen) |
| H-8     | $\pi$ (TTA)   | $\pi$ (TTA + phen) | $\pi$ (TTA + phen)   | $\pi$ (TTA)          | $\pi$ (TTA)        |
| H-7     | $\pi$ (TTA)   | $\pi$ (TTA + phen) | $\pi$ (TTA)          | $\pi$ (TTA)          | $\pi$ (TTA)        |
| H-6     | $\pi$ (TTA)   | $\pi$ (TTA)        | $\pi$ (TTA + phen)   | $\pi$ (TTA)          | $\pi$ (TTA)        |
| H-5     | $\pi$ (TTA)   | $\pi$ (TTA)        | $\pi$ (TTA)          | $\pi$ (TTA)          | $\pi$ (TTA)        |
| H-4     | $\pi$ (TTA)   | $\pi$ (TTA)        | $\pi$ (TTA)          | $\pi$ (TTA)          | $\pi$ (TTA)        |
| H-3     | $\pi$ (TTA)   | $\pi$ (TTA)        | $\pi$ (TTA + phen)   | $\pi$ (phen + TTA)   | $\pi$ (TTA)        |
| H-2     | $\pi$ (TTA)   | $\pi$ (TTA)        | $\pi$ (TTA)          | $\pi$ (TTA)          | $\pi$ (TTA)        |
| H-1     | $\pi$ (TTA)   | $\pi$ (TTA)        | $\pi$ (TTA)          | $\pi$ (TTA)          | $\pi$ (TTA)        |
| H       | $\pi$ (TTA)   | $\pi$ (TTA)        | $\pi$ (TTA)          | $\pi$ (TTA)          | $\pi$ (TTA)        |
| L       | $\pi^*$ (TTA) | $\pi^*$ (phen)     | $\pi^*$ (TTA)        | $\pi^*$ (TTA)        | $\pi^*$ (phen)     |
| L+1     | $\pi^*$ (TTA) | $\pi^*$ (TTA)      | $\pi^*$ (phen + TTA) | $\pi^*$ (TTA)        | $\pi^*$ (phen)     |
| L+2     | $\pi^*$ (TTA) | $\pi^*$ (phen)     | $\pi^*$ (TTA + phen) | $\pi^*$ (TTA)        | $\pi^*$ (TTA)      |
| L+3     | $\pi^*$ (TTA) | $\pi^*$ (TTA)      | $\pi^*$ (TTA)        | $\pi^*$ (phen + TTA) | $\pi^*$ (TTA)      |
| L+4     | $\pi^*$ (TTA) | $\pi^*$ (TTA)      | $\pi^*$ (TTA + phen) | $\pi^*$ (phen + TTA) | $\pi^*$ (TTA)      |

**Table S1- Molecular orbital composition of Eu(TTA)<sub>3</sub>(phen-X) complexes (cont.)**

| Orbital | Eu_phen_Br         | Eu_phen_carboxylate | Eu_phen_phenyl     | Eu_phen_1_butin_3_yn | Eu_phen_1_buten_3_yn |
|---------|--------------------|---------------------|--------------------|----------------------|----------------------|
| H-14    | $\pi$ (TTA)        | $\pi$ (phen + TTA)  | $\pi$ (phen)       | $\pi$ (phen)         | $\pi$ (TTA)          |
| H-13    | $\pi$ (phen)       | $\pi$ (phen)        | $\pi$ (TTA)        | $\pi$ (TTA)          | $\pi$ (TTA + phen)   |
| H-12    | $\pi$ (TTA)        | $\pi$ (TTA)         | $\pi$ (TTA)        | $\pi$ (TTA)          | $\pi$ (TTA)          |
| H-11    | $\pi$ (TTA + phen) | $\pi$ (TTA)         | $\pi$ (TTA)        | $\pi$ (phen)         | $\pi$ (phen + TTA)   |
| H-10    | $\pi$ (TTA)        | $\pi$ (TTA)         | $\pi$ (phen)       | $\pi$ (TTA)          | $\pi$ (TTA)          |
| H-9     | $\pi$ (TTA + phen) | $\pi$ (TTA)         | $\pi$ (TTA)        | $\pi$ (TTA)          | $\pi$ (TTA)          |
| H-8     | $\pi$ (TTA)        | $\pi$ (TTA + phen)  | $\pi$ (TTA)        | $\pi$ (TTA)          | $\pi$ (TTA)          |
| H-7     | $\pi$ (TTA)        | $\pi$ (TTA)         | $\pi$ (TTA)        | $\pi$ (TTA)          | $\pi$ (TTA)          |
| H-6     | $\pi$ (TTA)        | $\pi$ (TTA + phen)  | $\pi$ (TTA)        | $\pi$ (TTA)          | $\pi$ (TTA)          |
| H-5     | $\pi$ (TTA)        | $\pi$ (TTA)         | $\pi$ (TTA)        | $\pi$ (TTA)          | $\pi$ (TTA)          |
| H-4     | $\pi$ (TTA)        | $\pi$ (TTA)         | $\pi$ (TTA)        | $\pi$ (phen)         | $\pi$ (phen)         |
| H-3     | $\pi$ (TTA)        | $\pi$ (TTA + phen)  | $\pi$ (phen + TTA) | $\pi$ (phen + TTA)   | $\pi$ (TTA)          |
| H-2     | $\pi$ (TTA)        | $\pi$ (TTA)         | $\pi$ (TTA)        | $\pi$ (TTA + phen)   | $\pi$ (TTA + phen)   |
| H-1     | $\pi$ (TTA)        | $\pi$ (TTA)         | $\pi$ (TTA)        | $\pi$ (TTA)          | $\pi$ (TTA + phen)   |
| H       | $\pi$ (TTA)        | $\pi$ (TTA)         | $\pi$ (TTA)        | $\pi$ (TTA)          | $\pi$ (TTA + phen)   |
| L       | $\pi^*$ (phen)     | $\pi^*$ (phen)      | $\pi^*$ (phen)     | $\pi^*$ (phen)       | $\pi^*$ (phen)       |
| L+1     | $\pi^*$ (phen)     | $\pi^*$ (phen)      | $\pi^*$ (TTA)      | $\pi^*$ (phen)       | $\pi^*$ (phen)       |
| L+2     | $\pi^*$ (TTA)      | $\pi^*$ (TTA)       | $\pi^*$ (phen)     | $\pi^*$ (TTA)        | $\pi^*$ (TTA)        |
| L+3     | $\pi^*$ (TTA)      | $\pi^*$ (TTA)       | $\pi^*$ (TTA)      | $\pi^*$ (TTA)        | $\pi^*$ (TTA)        |
| L+4     | $\pi^*$ (TTA)      | $\pi^*$ (TTA)       | $\pi^*$ (TTA)      | $\pi^*$ (TTA)        | $\pi^*$ (TTA)        |

**Table S2- Calculated TD-B3LYP transitions for Eu(TTA)<sub>3</sub>(phen-X) complexes**

| Complexes              | transition      | $\lambda(\text{nm})^{[a]}$ | $f^{[b]}$           | composition <sup>[c]</sup> | $CI^{[d]}$ |
|------------------------|-----------------|----------------------------|---------------------|----------------------------|------------|
| <b>Eu_TTA</b>          | <b>S0 → S1</b>  | 379                        | 0.0058              | H → L                      | 0.69578    |
|                        |                 |                            |                     | H-2 → L+2                  | 0.33363    |
|                        | <b>S0 → S12</b> | 323                        | 0.5975              | H → L+2                    | 0.31489    |
|                        |                 |                            |                     | H-1 → L+2                  | 0.25342    |
|                        | <b>S0 → T1</b>  | 524                        | 0.00 <sup>[e]</sup> | H-1 → L+1                  | 0.53595    |
|                        |                 |                            |                     | H → L+1                    | 0.42899    |
|                        |                 |                            | H-1 → L+2           | 0.20884                    |            |
| <b>Eu_phen</b>         | <b>S0 → S1</b>  | 382                        | 0.0123              | H → L                      | 0.67790    |
|                        |                 |                            |                     | H-1 → L                    | 0.14497    |
|                        | <b>S0 → S18</b> | 320                        | 0.5496              | H-2 → L+1                  | 0.32702    |
|                        |                 |                            |                     | H → L+4                    | 0.26422    |
|                        |                 |                            |                     | H-2 → L+3                  | 0.25025    |
|                        | <b>S0 → T1</b>  | 530                        | 0.00 <sup>[e]</sup> | H → L+1                    | 0.49846    |
|                        |                 |                            | H-2 → L+4           | 0.37783                    |            |
|                        |                 |                            | H-1 → L+1           | 0.29100                    |            |
| <b>Eu_phen_methyl</b>  | <b>S0 → S1</b>  | 374                        | 0.0077              | H → L                      | 0.65926    |
|                        |                 |                            |                     | H-2 → L                    | 0.33533    |
|                        | <b>S0 → S18</b> | 321                        | 0.5252              | H-2 → L+3                  | 0.26704    |
|                        |                 |                            |                     | H → L+4                    | 0.21496    |
|                        | <b>S0 → T1</b>  | 531                        | 0.00 <sup>[e]</sup> | H → L                      | 0.46609    |
|                        |                 |                            |                     | H-2 → L+4                  | 0.30559    |
|                        |                 |                            | H-1 → L             | 0.27636                    |            |
| <b>Eu_phen_methoxy</b> | <b>S0 → S1</b>  | 374                        | 0.0069              | H → L                      | 0.66817    |
|                        |                 |                            |                     | H-2 → L+1                  | 0.12924    |
|                        | <b>S0 → S16</b> | 323                        | 0.2402              | H-2 → L                    | 0.25316    |
|                        |                 |                            |                     | H-2 → L+2                  | 0.22140    |
|                        |                 |                            |                     | H-1 → L+1                  | 0.20528    |
|                        | <b>S0 → T1</b>  | 531                        | 0.00 <sup>[e]</sup> | H → L                      | 0.46892    |
|                        |                 |                            | H-2 → L+1           | 0.33851                    |            |
|                        |                 |                            | H-1 → L             | 0.31465                    |            |
| <b>Eu_phen_chloro</b>  | <b>S0 → S1</b>  | 412                        | 0.0116              | H → L                      | 0.67750    |
|                        |                 |                            |                     | H-1 → L                    | 0.15608    |
|                        | <b>S0 → S21</b> | 321                        | 0.4720              | H-2 → L+2                  | 0.32554    |
|                        |                 |                            |                     | H → L+4                    | 0.26320    |
|                        |                 |                            |                     | H-1 → L+3                  | 0.24504    |
|                        | <b>S0 → T1</b>  | 530                        | 0.00 <sup>[e]</sup> | H → L+2                    | 0.47737    |
|                        |                 |                            | H-2 → L+4           | 0.33689                    |            |
|                        |                 |                            | H-1 → L+2           | 0.30048                    |            |

**Table S2- Calculated TD-B3LYP transitions for Eu(TTA)<sub>3</sub>(phen-X) complexes (cont.)**

| Complexes                   | transition      | $\lambda(\text{nm})^{[a]}$ | $f^{[b]}$           | composition <sup>[c]</sup> | $CI^{[d]}$ |
|-----------------------------|-----------------|----------------------------|---------------------|----------------------------|------------|
| <b>Eu_phen_bromo</b>        | <b>S0 → S1</b>  | 407                        | 0.0109              | H → L                      | 0.68213    |
|                             |                 |                            |                     | H-1 → L                    | 0.12295    |
|                             | <b>S0 → S21</b> | 321                        | 0.3578              | H-5 → L                    | 0.32171    |
|                             |                 |                            |                     | H-2 → L+2                  | 0.27670    |
|                             |                 |                            |                     | H → L+4                    | 0.2284     |
|                             | <b>S0 → T1</b>  | 530                        | 0.00 <sup>[e]</sup> | H → L+2                    | 0.48675    |
|                             |                 |                            |                     | H-2 → L+4                  | 0.33861    |
|                             |                 |                            |                     | H-1 → L+2                  | 0.28702    |
| <b>Eu_phen_carboxylate</b>  | <b>S0 → S1</b>  | 453                        | 0.0061              | H → L                      | 0.67484    |
|                             |                 |                            |                     | H → L+1                    | 0.15096    |
|                             |                 |                            |                     | H-1 → L                    | 0.12676    |
|                             | <b>S0 → S33</b> | 320                        | 0.5216              | H-2 → L+2                  | 0.31392    |
|                             |                 |                            |                     | H → L+4                    | 0.26184    |
|                             |                 |                            |                     | H-1 → L+3                  | 0.23571    |
|                             | <b>S0 → T1</b>  | 530                        | 0.00 <sup>[e]</sup> | H → L+2                    | 0.49859    |
|                             |                 |                            |                     | H-2 → L+4                  | 0.35640    |
| H-1 → L+2                   |                 |                            |                     | 0.28743                    |            |
| <b>Eu_phen_phenyl</b>       | <b>S0 → S1</b>  | 382                        | 0.0176              | H → L                      | 0.67985    |
|                             |                 |                            |                     | H-1 → L                    | 0.13215    |
|                             | <b>S0 → S19</b> | 321                        | 0.4121              | H-2 → L+1                  | 0.31647    |
|                             |                 |                            |                     | H → L+4                    | 0.24910    |
|                             |                 |                            |                     | H-1 → L+3                  | 0.22549    |
|                             | <b>S0 → T1</b>  | 531                        | 0.00 <sup>[e]</sup> | H → L+1                    | 0.48629    |
|                             |                 |                            |                     | H-2 → L+4                  | 0.36470    |
|                             |                 |                            |                     | H-1 → L+1                  | 0.29782    |
| <b>Eu_phen_1_butin_3_yn</b> | <b>S0 → S1</b>  | 414                        | 0.0280              | H → L                      | 0.68365    |
|                             |                 |                            |                     | H → L+1                    | 0.10745    |
|                             | <b>S0 → S19</b> | 338                        | 0.2955              | H-4 → L+1                  | 0.35793    |
|                             |                 |                            |                     | H-1 → L+4                  | 0.29064    |
|                             |                 |                            |                     | H-3 → L+2                  | 0.23544    |
|                             | <b>S0 → T1</b>  | 548                        | 0.00 <sup>[e]</sup> | H-4 → L                    | 0.40728    |
|                             |                 |                            |                     | H-3 → L+1                  | 0.43422    |
|                             |                 |                            |                     | H-2 → L+1                  | 0.28278    |
| <b>Eu_phen_1_buten_3_yn</b> | <b>S0 → S1</b>  | 410                        | 0.0573              | H → L                      | 0.66995    |
|                             |                 |                            |                     | H-2 → L                    | 0.12431    |
|                             | <b>S0 → S19</b> | 345                        | 0.4677              | H-4 → L+1                  | 0.42584    |
|                             |                 |                            |                     | H-4 → L                    | 0.24693    |

|                |     |                     |           |         |
|----------------|-----|---------------------|-----------|---------|
|                |     |                     | H-2 → L+4 | 0.14242 |
|                |     |                     | H → L+1   | 0.41743 |
| <b>S0 → T1</b> | 589 | 0.00 <sup>[e]</sup> | H-1 → L+1 | 0.27622 |
|                |     |                     | H-2 → L+1 | 0.23887 |

[a] Only the selected low-lying excited states are presented;

[b] Oscillator strength;

[c] Only the three primary transitions are reported; H stands for HOMO and L stands for LUMO

[d] The CI coefficients are in absolute values.

[e] No spin-orbital coupling effect was considered, thus the f values are zero
